# Supplementary material
Source: PubMed Central journal article supplement (PMC5288823)
Supplement: AEM.02750-16_zam999117671s1.pdf [file AEM.02750-16_zam999117671s1.pdf]

1

2 **Supplementary material**

3

4 **Unexpected diversity and high abundance of putative nitric oxide dismutase (Nod)**  
5 **genes in contaminated aquifers and wastewater treatment systems**

6

7 Baoli Zhu<sup>a</sup>, Lauren Bradford<sup>a</sup>, Sichao Huang<sup>a</sup>, Anna Szalay<sup>a</sup>, Carmen Leix<sup>b</sup>, Max Weissbach<sup>b</sup>,  
8 András Táncsics<sup>c</sup>, Jörg E. Drewes<sup>b</sup>, Tillmann Lueders<sup>a</sup>

9

10 <sup>a</sup> Institute of Groundwater Ecology, Helmholtz-Zentrum Muenchen, Germany

11 <sup>b</sup> Chair of Urban Water Systems Engineering, Technical University of Munich, Germany

12 <sup>c</sup> Szent István University, Gödöllő, Hungary

13

14

15

16

17 **Supplementary Fig. S1.** Multiple sequence alignment of selected putative Nod and qNor  
18 enzymes around the quinol-binding site and the catalytic site of qNor. Representative  
19 environmental Nods were deduced from the gene sequences generated in this study (in  
20 bold). The alignment is extended by further Nod sequences generated in this study  
21 compared to Fig. 5. The conserved residuals for quinol-binding (A) and catalytic functioning  
22 (B) in qNor are highlighted in red, whereas substitutions at these sites in putative Nod and  
23 putative Nor are shown in green. Note that the number and order of Nod sequences included  
24 in (A) and (B) are different. Accession numbers are the same as in Fig. 2. The alignment  
25 was generated with ClustalW in MEGA 6.

26

|                        |                                         | 328       | 332   | 336   | 746   |       |
|------------------------|-----------------------------------------|-----------|-------|-------|-------|-------|
| qNor                   | <i>Geobacillus stearothermophilus</i>   | ALLAH     | HYYTE | PDS   | FFGI  | PDI   |
|                        | <i>Staphylococcus aureus</i>            | ELLAH     | YVENK | -     | FFGI  | WDI   |
|                        | <i>Neisseria gonorrhoeae</i>            | GLTAH     | YTV   | EGQG  | FFGI  | PDL   |
|                        | <i>M. oxyfera</i> DAMO_1889             | AAVAH     | YRAE  | PGKF  | FFGL  | GDA   |
|                        | HdN1                                    | GFTA      | HYT   | EGQT  | FFGI  | GDV   |
| unknown<br>Nor-related | <i>Bacteroidetes bacterium</i>          | VLTVH     | DFV   | GFVN  | FFGF  | GGS   |
|                        | <i>Sediminibacterium</i> sp.            | ILTVH     | DFV   | GFVH  | FFGV  | GGA   |
|                        | <i>Chlorobi bacterium</i>               | ILTVH     | DFV   | GFVN  | FFGY  | GGA   |
|                        | <i>Algoriphagus mannitolivorans</i>     | VLTVH     | DFV   | GFTS  | FFGL  | GGS   |
|                        | <i>Mariniradius saccharolyticus</i>     | VLTVH     | DFV   | GFTN  | FFGV  | GGS   |
|                        | <i>Cecembia lonarensis</i>              | VLTVH     | DFV   | GFTK  | FFGW  | GGA   |
|                        | <i>Indibacter alkaliphilus</i>          | VLTVH     | DFV   | GFTK  | FFGW  | GGA   |
|                        | <i>Flaviumibacter</i> sp.               | ILTVH     | DFV   | GFVN  | FFGF  | GGS   |
|                        | <b>Siklós Sik2DC09</b> KX364417         | VLTVH     | DFVN  | FTV   | FFGF  | · · · |
|                        | <i>Muricauda ruestringensis</i>         | FITINE    | FIDY  | LG    | YFGI  | GAC   |
|                        | <i>Arenibacter algicola</i>             | FVTINE    | FVDY  | LG    | FFGV  | GAC   |
|                        | <i>M. oxyfera</i> DAMO_2437             | ILGAED    | FVGG  | PG    | EAI   | GEV   |
|                        | <i>M. oxyfera</i> DAMO_2434             | ILSAED    | FVGG  | PG    | SAI   | GGA   |
|                        | <i>Methylomirabilis</i> sp.             | ILSAED    | FVGG  | PG    | SAL   | GGA   |
|                        | <i>Methylomirabilis</i> sp.             | ILGAED    | FVGG  | PG    | GESI  | GGA   |
| HdN1 Nod               | IAAAW                                   | DFVK      | P     | ----  | GIA   |       |
| Nod                    | <b>Siklós Sik2DC15</b> KX364445         | ILGAED    | FVGG  | PG    | GETI  |       |
|                        | <b>Siklós Sik2DC08</b> KX364446         | IIGAED    | FIGG  | PP    | VDAM  |       |
|                        | <b>Siklós Sik2DC03</b> KX364447         | ILSAEN    | FVK   | SG    | PGTVI |       |
|                        | <b>Siklós Sik2DA06</b> KX364449         | ILGAED    | FVGG  | PG    | EAI   |       |
|                        | <b>Siklós Sik2DA05</b> KX364450         | ILSAED    | FVGG  | PG    | SAL   |       |
|                        | <b>Siklós Sik1DB16</b> KX364451         | ILGAED    | FVGG  | PG    | GETI  |       |
|                        | <b>Siklós Sik1DB14</b> KX364452         | ILSAED    | FVGG  | PG    | GNAI  |       |
|                        | <b>WWTP-TUM 8-2-M12</b> KX364419        | VIAAM     | DFV   | LP    |       |       |
|                        | <b>WWTP-TUM 1-4</b> KX364420            | IISAT     | D     | FLRP  |       |       |
|                        | <b>WWTP-TUM 1-11</b> KX364422           | IVGAS     | D     | FIKP  |       |       |
|                        | <b>WWTP-Kempton R2-3</b> KX364423       | VIAAW     | DFI   | KP    |       |       |
|                        | <b>WWTP-Kempton R2-2</b> KX364424       | MAAAW     | DFV   | KP    |       |       |
|                        | <b>WWTP-Kempton R2</b> KX364428         | VIAAM     | DFV   | LP    |       |       |
|                        | <b>2-stage-nitritation 2-4</b> KX364429 | IAAAW     | DFV   | KP    |       |       |
|                        | <b>2-stage-nitritation 2-1</b> KX364430 | IAAAW     | DFV   | KP    |       |       |
|                        | <b>2-stage-AMX 3-5</b> KX364431         | ILCAT     | D     | FVRP  |       |       |
|                        | <b>2-stage-AMX 3-3</b> KX364432         | IAAAW     | DFV   | KP    |       |       |
|                        | <b>Swing-redox 1-5</b> KX364433         | ILAST     | D     | FVRP  |       |       |
|                        | <b>Suspension R3-2</b> KX364435         | VVSAW     | D     | FIRP  |       |       |
|                        | <b>Suspension R3-1</b> KX364436         | ILCAN     | D     | FVRT  |       |       |
|                        | <b>CANDO R5-3</b> KX364441              | MAAAW     | DFV   | KP    |       |       |
|                        | <b>CANDO R4-1</b> KX364444              | VIAAW     | DFI   | KP    |       |       |
|                        | <b>Siklós Sik2DA12</b> KX364448         | IVGA      | A     | DFIKP |       |       |
|                        | <b>Flingern Fln8DB07</b> KX364453       | VISAT     | D     | FLRP  |       |       |
|                        | <b>WWTP-TUM 1-12</b> KX364421           | · · ·     | FVRT  | DRL   |       |       |
|                        | <b>Suspension R1-3</b> KX36439          | · · · · · | D     | FIKP  |       |       |

Fig S1 A

|                             |                                       | 508             | 512     | 559 560 | 581   |
|-----------------------------|---------------------------------------|-----------------|---------|---------|-------|
| qNor                        | <i>Geobacillus stearothermophilus</i> | I I H L W V E G |         | G H H Y | L E V |
|                             | <i>Staphylococcus aureus</i>          | I V H L W V E G |         | G H H Y | L E V |
|                             | <i>Neisseria gonorrhoeae</i>          | V V H L W V E G |         | L H H L | L E V |
|                             | <i>M. oxyfera</i> DAMO_1889           | I V H L W V E G |         | G H H W | M E V |
|                             | HdN1                                  | V V H L W V E G |         | F H H L | L E V |
| unknown<br>Nor-related      | <i>Bacteroidetes bacterium</i>        | V I H M W A E A |         | S H N F | L Q V |
|                             | <i>Sediminibacterium</i> sp.          | V I H M W A E A |         | S H N F | L Q V |
|                             | <i>Chlorobi bacterium</i>             | V I H M W A E A |         | S H N F | L Q V |
|                             | <i>Algoriphagus mannitolivorans</i>   | V V H M W V E A |         | S H N F | L Q V |
|                             | <i>Mariniradius saccharolyticus</i>   | V V H M W V E A |         | S H N F | L Q V |
|                             | <i>Cecembia lonarensis</i>            | V V H M W V E A |         | S H N F | L Q V |
|                             | <i>Indibacter alkaliphilus</i>        | V V H M W V E A |         | S H N F | L Q V |
|                             | <i>Flavihumbacter</i> sp.             | V V H M W A E A |         | S H N F | L Q V |
|                             | WWTP-Kempton R2-7 KX364416            | V I H M W V E A |         | A H N F | . . . |
|                             | Siklós Sik2DC09 KX364417              | V I H M W A E A |         | S H N F | . . . |
|                             | <i>Muricauda ruestringensis</i>       | V V H M W V E A |         | S H N F | L Q F |
|                             | <i>Arenibacter algicola</i>           | V V H M W V E A |         | S H N F | L Q F |
|                             | <i>M. oxyfera</i> DAMO_2437           | N I H M W V E V |         | S H N F | M Q V |
|                             | <i>M. oxyfera</i> DAMO_2434           | N I H M W V E V |         | S H N F | M Q V |
|                             | <i>Methylomirabilis</i> sp.           | N I H M W V E V |         | S H N F | M Q V |
| <i>Methylomirabilis</i> sp. | N I H M W V E V                       |                 | S H N F | M Q V   |       |
| HdN1 Nod                    | V V H M W V E V                       |                 | S H N F | L Q V   |       |
| Nod                         | WWTP-Kempton R2-3 KX364423            | T V H M W V E V |         | S H N F | L Q V |
|                             | WWTP-Kempton R2-2 KX364424            | V V H M W V E V |         | S H N F | L Q V |
|                             | Siklós Sik2DA12 KX364448              | V V H M W V E V |         | S H N F | L Q V |
|                             | Siklós Sik2DA06 KX364449              | N I H M W V E V |         | S H N F | M Q V |
|                             | Siklós Sik2DA05 KX364450              | N I H M W V E V |         | S H N F | M Q V |
|                             | WWTP-TUM M16-4 KX364418               | V A H M W V E V |         | A H N F |       |
|                             | WWTP-TUM M12-8-2 KX364419             | V V H M W V E V |         | S H N F |       |
|                             | WWTP-TUM 1-12 KX364421                | V V H M W V E A |         | S H N F |       |
|                             | WWTP-Kempton R2-8 KX364425            | V V H M W V E A |         | S H N F |       |
|                             | WWTP-Kempton R2-2 KX364426            | T V H M W V E V |         | S H N F |       |
|                             | WWTP-Kempton R2-1 KX364427            | V V H M W V E V |         | A H N F |       |
|                             | 2-stage-nitrification 2-4 KX364429    | V V H M W V E V |         | S H N F |       |
|                             | Suspension R3-22 KX364434             | V V H M W V E V |         | S H N F |       |
|                             | Suspension R3-2 KX364435              | T V H M W V E V |         | S H N F |       |
|                             | Suspension R1-7 KX364437              | V V H M W V E V |         | A H N F |       |
|                             | Suspension R1-5 KX364438              | V V H M W V E V |         | S H N F |       |
|                             | Suspension R1-3 KX364439              | V V H M W V E V |         | S H N F |       |
|                             | CANDO R5-6 KX364440                   | V V H M W V E V |         | S H N F |       |
|                             | CANDO R5-2 KX364442                   | V V H M W V E V |         | S H N F |       |
|                             | CANDO R4-12 KX364443                  | V V H M W V E V |         | A H N F |       |
| CANDO R4-1 KX364444         | T V H M W V E V                       |                 | S H N F |         |       |
| Siklós Sik2DC15 KX364445    | N I H M W V E V                       |                 | S H N F |         |       |
| Siklós Sik2DC08 KX364446    | N I H M W V E V                       |                 | S H N F |         |       |
| Siklós Sik2DC03 KX364447    | T V H M W V E V                       |                 | S H N F |         |       |

Fig S1 B
